# Supplementary material for: How Teachers Conduct Online Teaching During the COVID-19 Pandemic: A Case Study of Taiwan
Source: Frontiers journal article supplement (doi:10.3389/feduc.2021.675434), 2021-05-28
Supplement: Table_1.docx [file Table_1.docx]

**SUPPLEMENTARY MATERIAL**

Significant behavioral sequences (all)

|  | Colleges | Secondary schools | Elementary schools |
| --- | --- | --- | --- |
| Similarities | A1→B5: 5.00  A3→B1: 2.70  B5→C7: 4.04  C3→C4: 7.00  D1→ D2: 2.86  D2→ D3: 4.57 | | |
| Differences-A Teaching | A1→A2: 2.87  A1→B3: 2.25  A1→B9: 2.56  A2→A6: 8.69  A3→B11: 3.06  A4→A5: 3.25  A4→B4: 4.80  A4→C2: 2.20  A4→ D1: 2.20  A5→B6: 8.66  A5→ D1: 2.14  A6→B11: 3.67  A6→C2: 2.14 | A1→A2: 2.77  A1→A3: 3.03  A2→B7: 8.96  A3→A6: 3.09  A3→B3: 2.86  A4→B3: 3.45  A4→D1: 2.58  A5→A6: 3.23  A5→B1: 2.64  A5→B11: 3.42  A5→B12: 2.95  A6→B2: 5.22  A6→B4: 7.25  A6→ C11: 5.03 | A1→A3: 3.72  A1→B3: 4.30  A1→B4: 2.31  A1→B9: 2.78  A2→A3: 3.88  A2→A6: 5.89  A3→A5: 4.12  A3→A6: 3.88  A3→B3: 6.42  A3→B11: 2.98  A3→B12: 1.97  A4→B2: 2.99  A4→B3: 4.59  A5→A6: 3.23  A5→B2: 7.52  A5→B3: 3.77  A5→B7: 6.47  A5→C1: 3.74  A6→B3: 2.42  A6→B4: 4.37  A6→C2: 2.62 |
| Differences-B Learning interaction | B1→C2: 2.20  B3→B1: 2.70  B3→B9: 3.55  B4→C2: 3.32  B5→B10: 5.31  B6→C7: 4.89  B7→C7: 2.57  B7→ D3: 3.88  B9→C2: 3.00  B9→C7: 2.12  B9→C13: 2.76  B10→C3: 7.05  B11→B7: 2.86  B11→B12: 5.31  B11→C3: 2.86  B12→ C8: 7.05 | B1→B3: 3.46  B1→B11: 2.34  B2→C1: 3.69  B2→C2: 3.36  B3→A1: 2.37  B3→C2: 3.34  B3→C9: 3.98  B4→C13: 5.91  B7→B9: 10.42  B9→C2: 3.72  B9→C3: 2.45  B11→B9: 2.00  B11→B12: 2.62  B11→B13: 3.71  B11→C1: 2.00  B11→C3: 5.82  B11→C7: 2.83  B11→ C9: 2.32  B12→B2: 4.66  B12→B11: 2.70  B13→C8: 8.96  B13→C9: 4.26 | B1→B2: 2.31  B1→B5: 2.45  B1→B7: 3.53  B1→C2: 2.53  B1→C6: 2.60  B1→D4: 4.43  B2→B4: 2.60  B2→B12: 3.23  B2→B13: 2.19  B2→C3: 3.67  B3→B5: 2.40  B3→B9: 4.01  B3→B11: 2.67  B3→C2: 5.82  B4→B2: 2.60  B4→B6: 5.72  B4→B7: 3.92  B4→B11: 3.23  B5→C6: 2.75  B6→B11: 2.02  B6→C2: 4.12  B7→B11: 4.57  B7→B13: 3.38  B9→B10: 6.76  B9→C5: 4.14  B9→C9: 3.40  B10→C3: 2.56  B10→C7: 3.89  B11→B13: 3.67  B11→C2: 6.52  B11→C6: 3.11  B11→C7: 3.22  B11→C9: 2.39  B11→C13: 2.10  B12→C4: 5.27  B12→C6: 3.60  B12- C12: 6.90  B13→B7: 3.37  B13→C4: 7.73 |
| Differences-C Learning effectiveness | C1→C12: 6.06  C2→C6: 3.18  C2→C10: 3.50  C3→B11: 2.88  C3→ C12: 7.00  C4→C10: 7.05  C7→C8: 2.54  C7→C13: 2.10  C8→ C9: 2.88  C10→C13: 3.29  C12→ C9: 5.39 | C1→D4: 5.89  C2→C4: 2.08  C2→C13: 5.00  C3→ C9: 2.89  C3→ C10: 2.19  C4→ C9: 3.02  C9→C10: 4.84  C9→ D3: 2.28  C10→C1: 2.80  C10→ C11: 3.56  C10→ D3: 2.80 | C1→B1: 6.45  C1→C9: 2.96  C2→C1: 2.34  C2→C3: 5.51  C2→C6: 2.81  C2→C7: 2.04  C2→C10: 3.94  C2→C11: 2.84  C3→C9: 4.97  C3→C12: 2.51  C3→D4: 2.08  C4→C5: 8.22  C4→C10: 2.16  C4→D1: 2.43  C5→C3: 2.57  C5→ C9: 4.96  C6→C7: 3.89  C6→C10: 3.05  C7→C5: 3.69  C7→C9: 4.83  C7→C13: 4.54  C9→ C10: 5.14  C9→ C13: 3.63  C9→ D3: 3.68  C10→ D4: 2.46  C10→ C11: 4.65  C10→ C13: 3.52  C11→ C13: 3.34  C11→ D3: 4.20  C12→B13: 4.99  C13→ D4: 3.77  C13→ C12: 4.42  C13→ D3: 3.08 |
| Differences-D Others | D1→A6: 2.04  D3→A4: 2.57  D3→C1: 7.00 | D1→A1: 2.45  D2→A2: 2.67  D2→A3: 2.33  D1→ D4: 2.98 | D1→A3: 2.30  D2→A1: 4.24  D2→A3: 3.18  D3→A1: 2.68  D4→B9: 3.55 |
